# Supplementary material for: Application of 1-Hydroxy-4,5-Dimethyl-Imidazole 3-Oxide as Coformer in Formation of Pharmaceutical Cocrystals
Source: MDPI journal article supplement (doi:10.3390/pharmaceutics12040359), 2020-04-15
Supplement: s1 [file s1]

# Supplementary Materials: Application of 1-Hydroxy-4,5-Dimethyl-Imidazole 3-Oxide as Coformer in Formation of Pharmaceutical Cocrystals

Aneta Wróblewska, Justyna Śniechowska, Sławomir Kaźmierski, Ewelina Wielgus, Grzegorz D. Bujacz, Grzegorz Młostoń, Arkadiusz Chworos, Justyna Suwara and Marek J. Potrzebowski

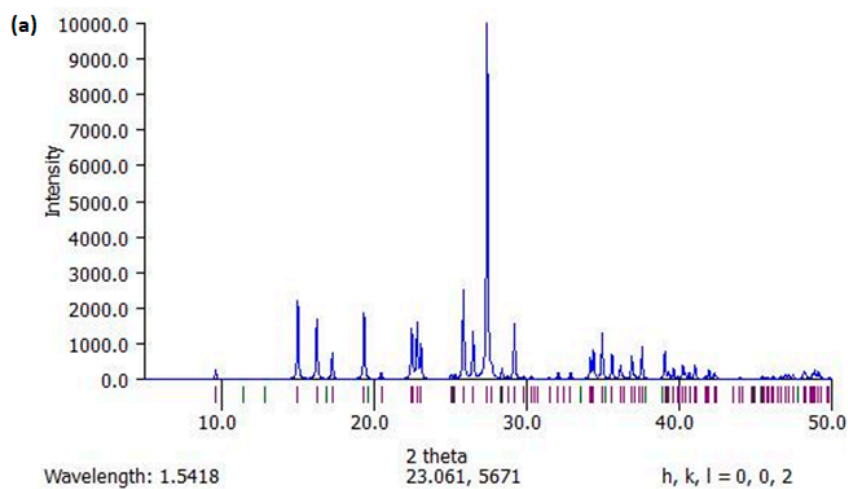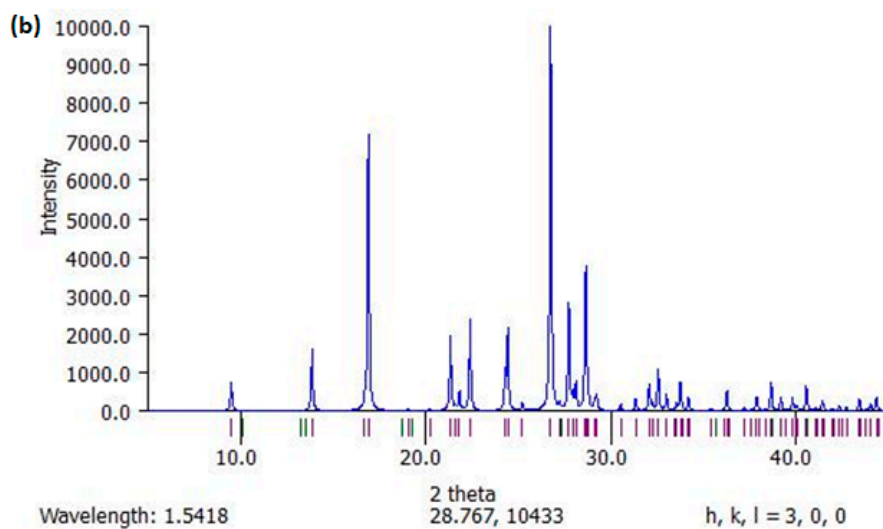

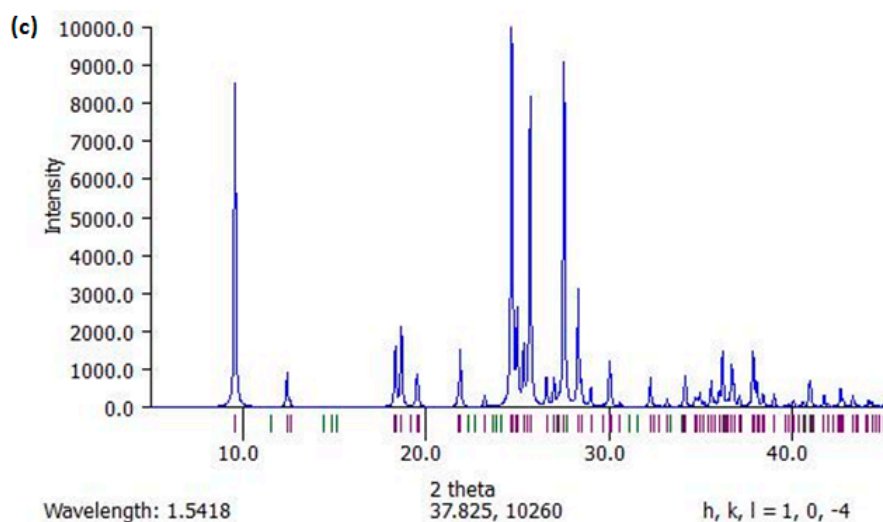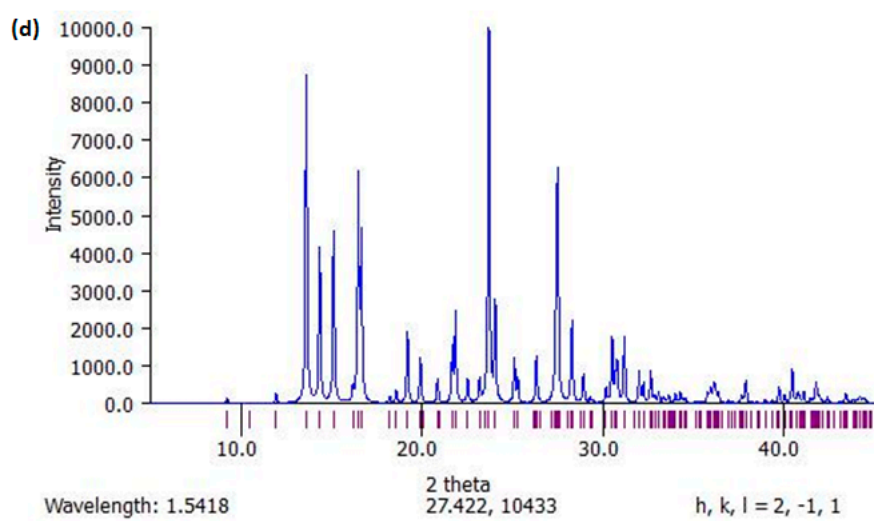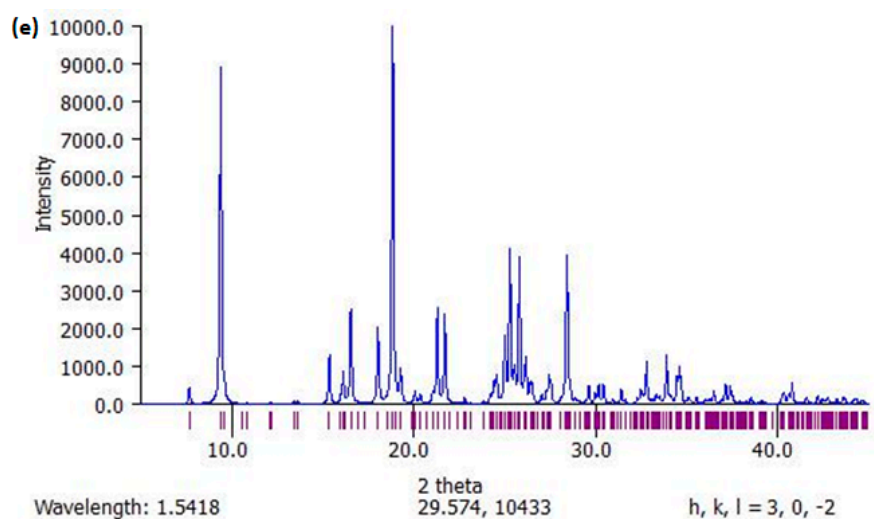

**Figure S1.** Calculated powder x-ray diffraction diffractograms (from top to bottom) TBA crystallized from acetonitril (tautomer A)<sup>1</sup>; TBA crystallized from ethanol (tautomer B)<sup>1</sup>; TBA crystallized from water (tautomer B)<sup>1</sup>; HIMO; TBA/HIMO.

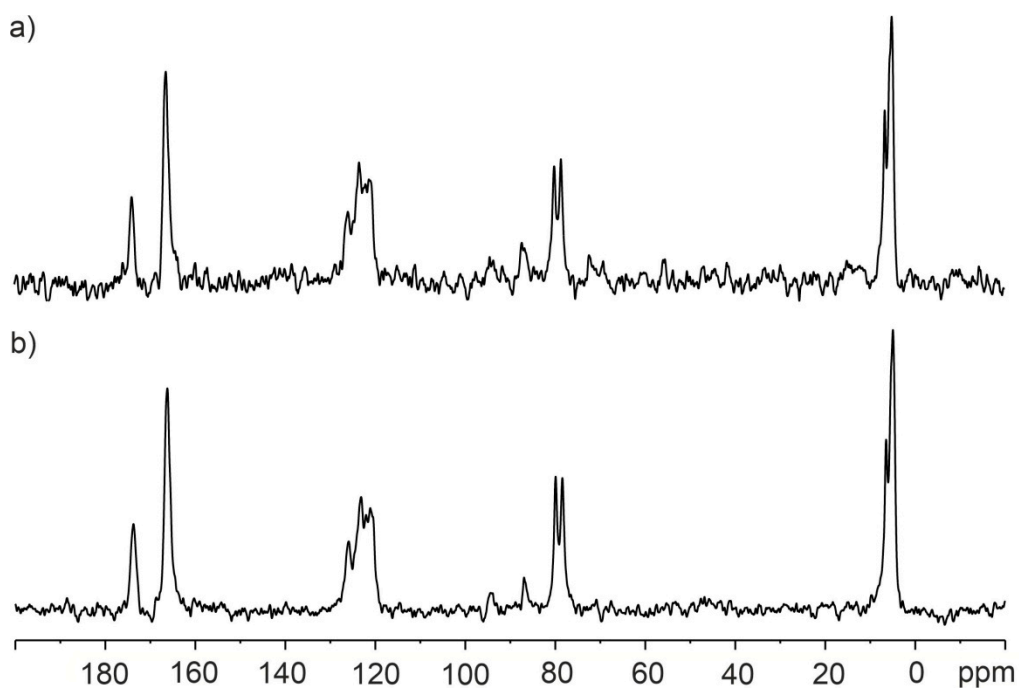

**Figure S2.**  $^{13}\text{C}$  CP/MAS spectra recorded with a spinning rate of 8 kHz for TBA/HIMO cocrystals obtained by (a) grinding; (b) cocrystallization from MeOH.

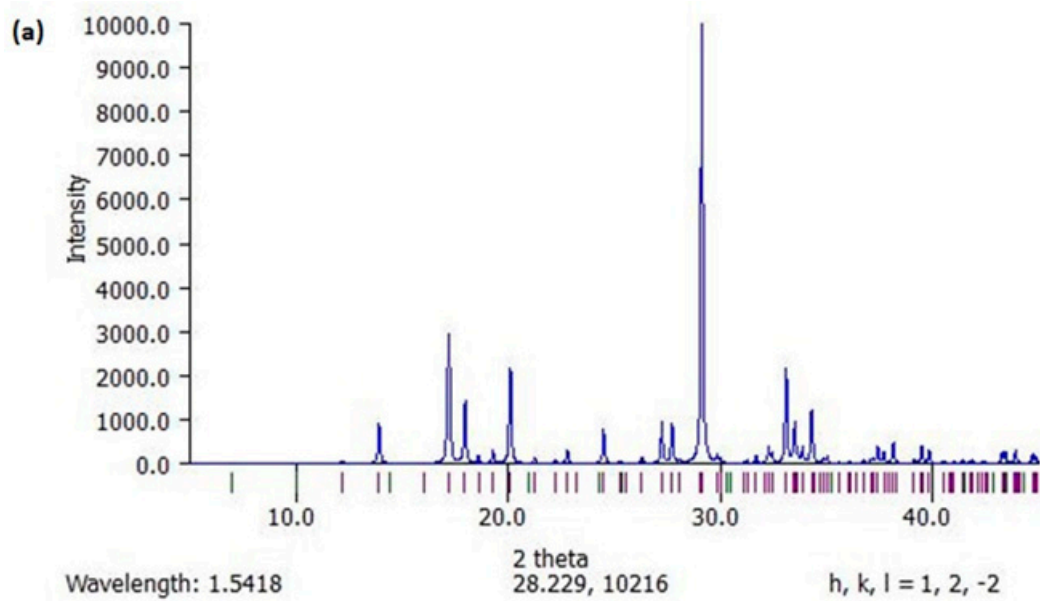

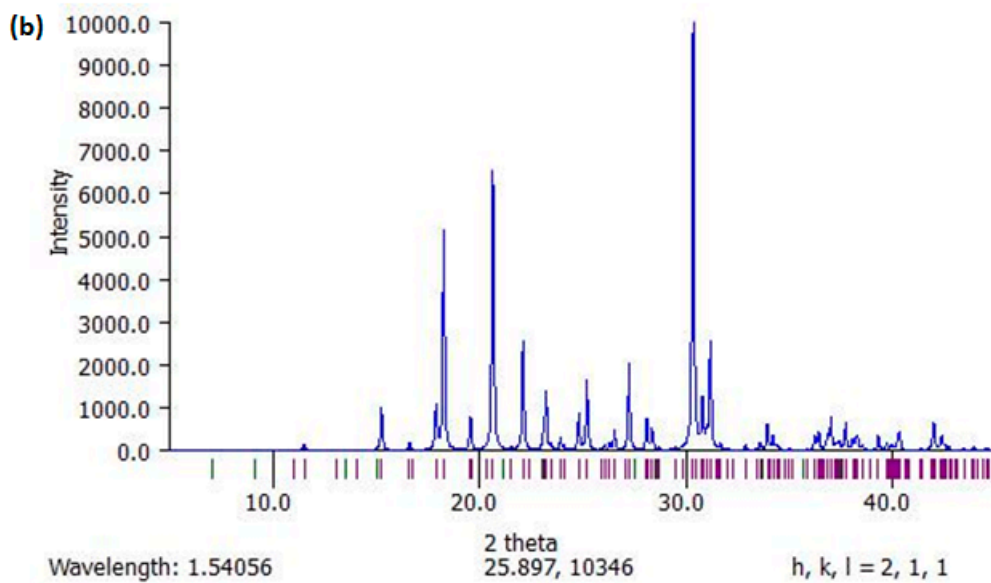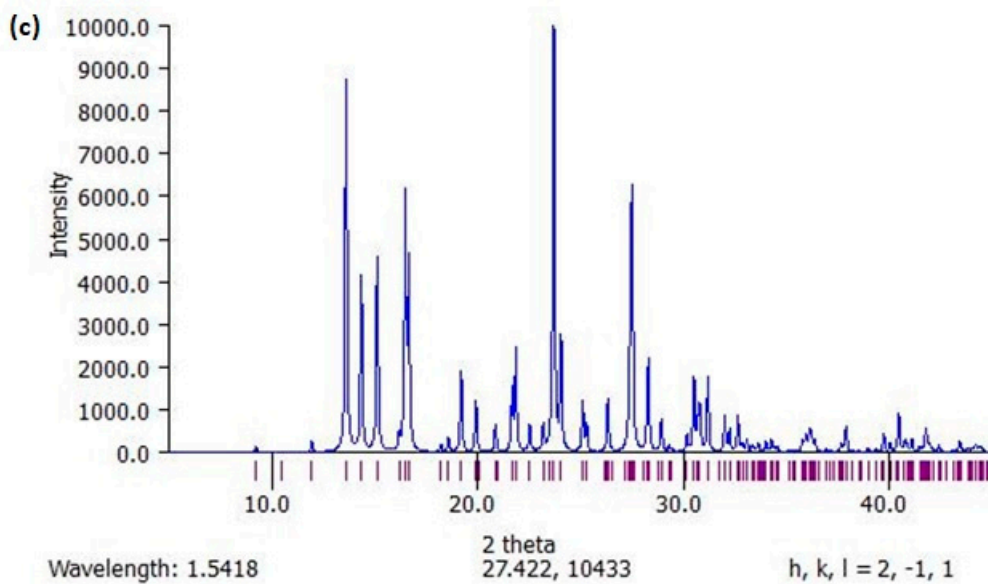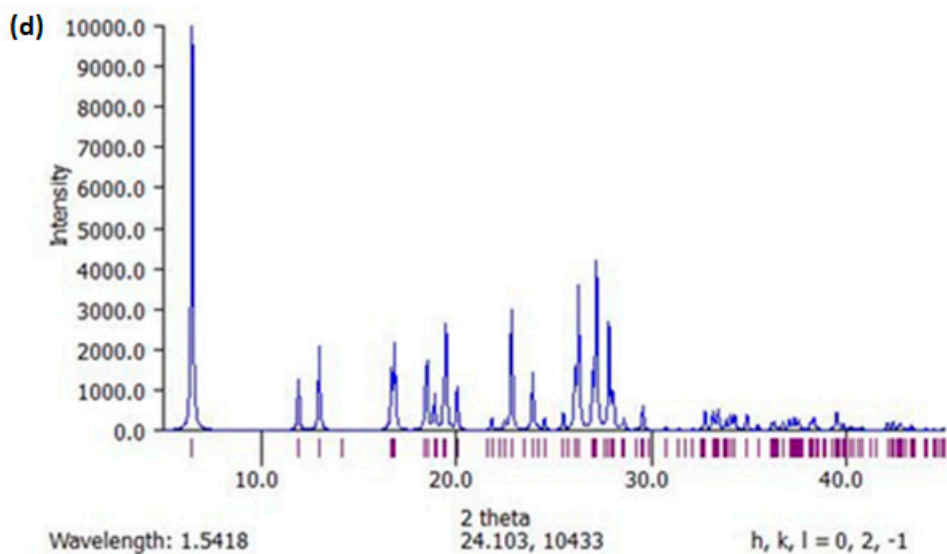

**Figure S3.** Calculated powder x-ray diffraction diffractograms (from top to bottom) for; BA (form II)<sup>2</sup>, BA dihydrate<sup>3</sup>; HIMO and BA/HIMO.

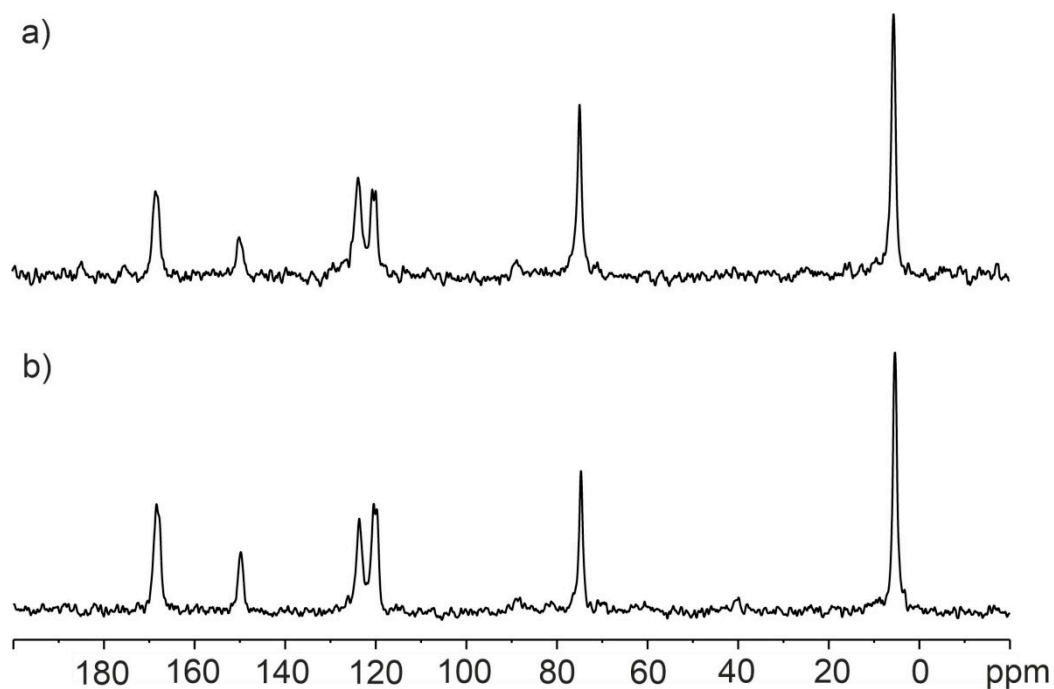

**Figure S4.** <sup>13</sup>C CP/MAS spectra recorded with a spinning rate of 8 kHz for BA/HIMO cocrystals obtained by (a) grinding; (b) cocrystallization from MeOH.

## References

1. Chierotti, M.R.; Ferrero, L.; Garino, N.; Gobetto, R.; Pellegrino, L.; Braga, D.; Grepioni, F.; Maini, L. The Richest Collection of Tautomeric Polymorphs: The Case of 2-Thiobarbituric Acid. *Chem. Eur. J.* **2010**, *16*, 4347–4358.
2. Lewis T. C, Tocher D. A., Price S. L. An Experimental and Theoretical Search for Polymorphs of Barbituric Acid: The Challenges of Even Limited Conformational Flexibility *Crystal Growth & Design* **2004**, *4*, 979-987
3. Nichol G.S., Clegg W., *Acta Crystallographica, Section B: Structural Science*, A variable-temperature study of a phase transition in barbituric acid dihydrate **2005**, *61*, 464-472
